# Supplementary material for: Structural Insight into Inhibition of CsrA-RNA Interaction Revealed by Docking, Molecular Dynamics and Free Energy Calculations
Source: PubMed Central journal article supplement (PMC5668361; doi:10.1038/s41598-017-14916-6), 2017-11-02
Supplement: 41598_2017_14916_MOESM1_ESM.pdf [file 41598_2017_14916_MOESM1_ESM.pdf]

# Supplementary Information

## **Structural Insight into Inhibition of CsrA-RNA Interaction Revealed by Docking, Molecular Dynamics and Free Energy Calculations**

Xiaodong Ren<sup>1</sup>, Rui Zeng<sup>2</sup>, Micky Tortorella<sup>3</sup>, Jinming Wang<sup>3</sup> & Changwei Wang<sup>3,\*</sup>

<sup>1</sup>Department of Pharmacy, Guizhou Provincial People's Hospital, Guiyang 550002, P.R. China.

<sup>2</sup>College of Pharmacy, Southwest University for Nationalities, Chengdu 610041, P.R. China.

<sup>3</sup>Guangzhou Institute of Biomedicine and Health (GIBH), Chinese Academy of Sciences (CAS), Guangzhou, Guangdong 510530, P.R. China

Correspondence and requests for materials should be addressed to C.W. (email: [wang\\_changwei@gibh.ac.cn](mailto:wang_changwei@gibh.ac.cn))

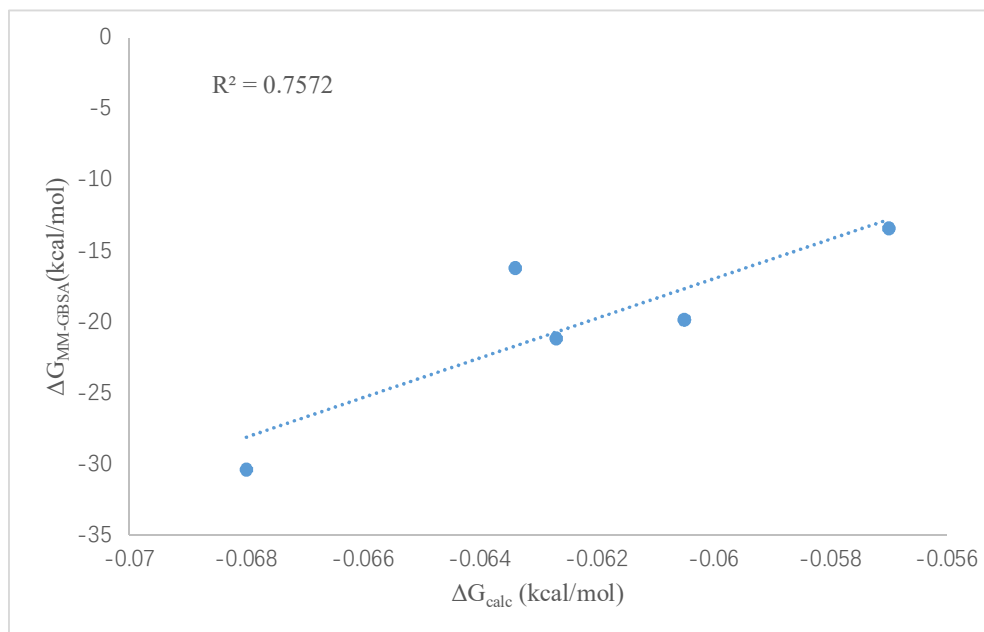

**Figure S1.** Correlation of the predicted binding energies by MM-GBSA ( $\Delta G_{\text{MM-GBSA}}$ ) using igb = 1 with binding energy ( $\Delta G_{\text{calc}}$ ) calculated from experimental IC<sub>50</sub>.

---

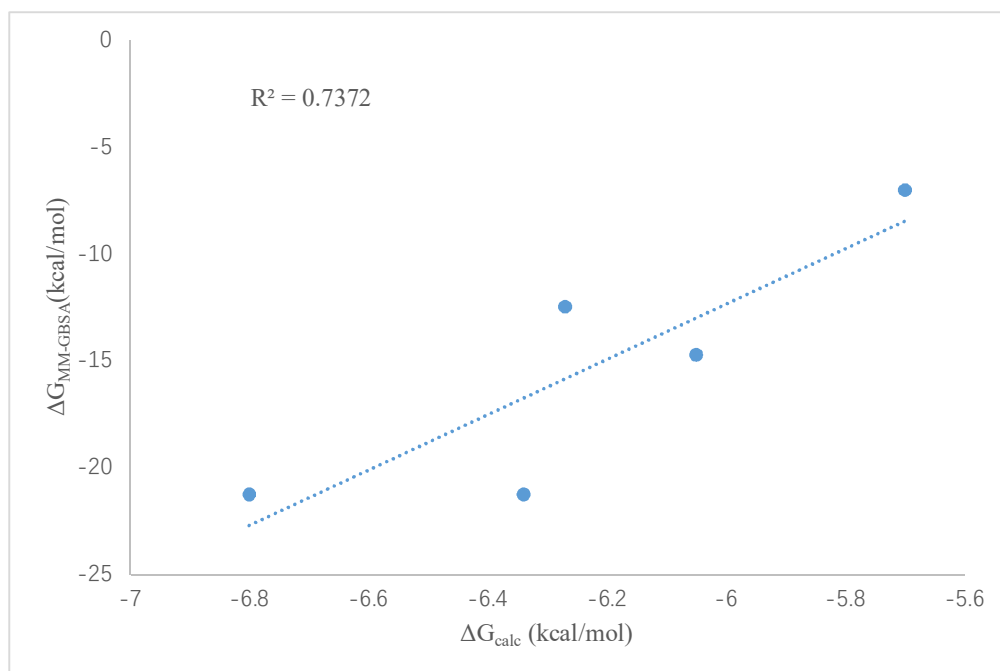

**Figure S2.** Correlation of the predicted binding energies by MM-GBSA ( $\Delta G_{\text{MM-GBSA}}$ ) using igb = 7 with binding energy ( $\Delta G_{\text{calc}}$ ) calculated from experimental IC<sub>50</sub>.

---

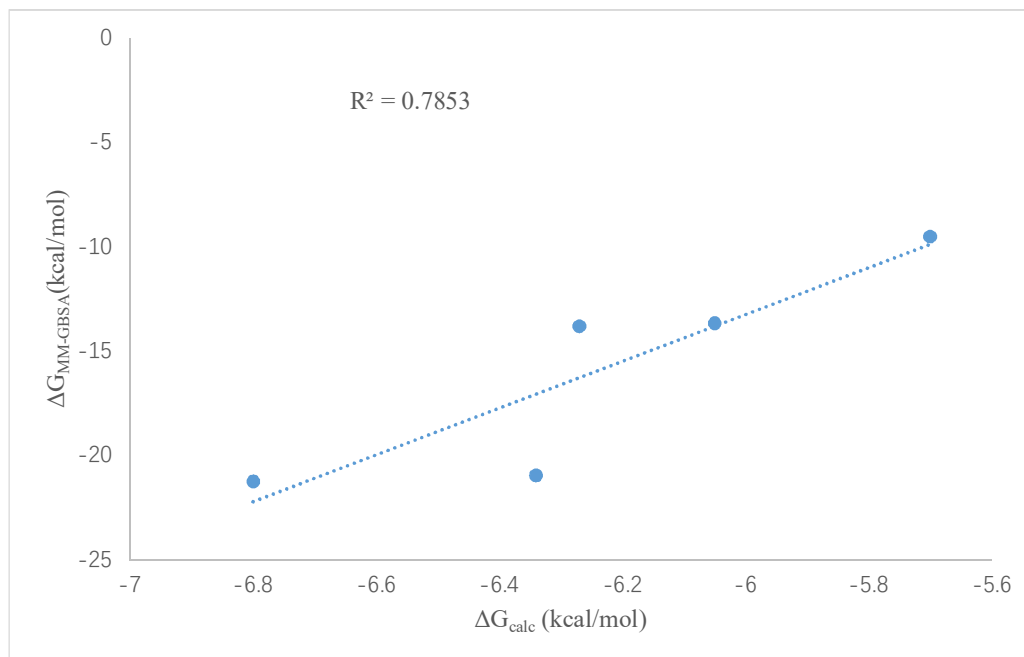

**Figure S3.** Correlation of the predicted binding energies by MM-GBSA ( $\Delta G_{\text{MM-GBSA}}$ ) using  $\text{igb} = 8$  with binding energy ( $\Delta G_{\text{calc}}$ ) calculated from experimental  $\text{IC}_{50}$ .

.....

```

                                10      20      30      40      50      60
CsrA(Y. pseudotuberculosis)  .....|.....| .....|.....| .....|.....| .....|.....| .....|.....|
2BTI_A                        MLILTRRVGE TLMIGDEVTV TVLGVKGNQV RIGVNAPKEV SVHREEIYQR IQAEKSQPTT Y
2BTI_B                        MLILTRRVGE TLMIGDEVTV TVLGVKGNQV RIGVNAPKEV SVHREEIYQR IQAEKSQPTS Y

```

**Figure S4.** Sequence alignment between CsrA from *Y. pseudotuberculosis* YPIII and the two chains of 2BTI<sup>a</sup>.

<sup>a</sup>Note: The amino acid sequence of CsrA (*Y. pseudotuberculosis*) was retrieved from UniProt database (Accession No. B1JJ99) at <http://www.uniprot.org>. The sequence of 2BTI protein are retrieved from Protein Data Bank (PDB). Sequence alignment was carried out using Pymod 2.0<sup>1</sup>. The aligned sequences are plotted using BioEdit 7.2.5<sup>2</sup>.

.....

**Table S1.** MM/GBSA binding free energies and different components of CsrA-inhibitor complexes calculated from the MD simulations using  $\text{igb} = 1$ . <sup>a</sup>All values are given in kcal/mol and as average  $\pm$  SEM (standard error of the mean).

| Compounds | $\Delta E_{\text{vdW}}^a$ | $\Delta E_{\text{ele}}^a$ | $\Delta G_{\text{polar}}^a$ | $\Delta G_{\text{nonpolar}}^a$ | $\Delta G_{\text{MM-GBSA}}^a$ |
|-----------|---------------------------|---------------------------|-----------------------------|--------------------------------|-------------------------------|
| 1         | -23.88 $\pm$ 0.23         | -9.53 $\pm$ 0.23          | 16.52 $\pm$ 0.22            | -2.92 $\pm$ 0.03               | -19.81 $\pm$ 0.24             |
| 2         | -15.95 $\pm$ 0.28         | -21.14 $\pm$ 0.38         | 25.66 $\pm$ 0.40            | -1.96 $\pm$ 0.03               | -13.39 $\pm$ 0.26             |
| 3         | -22.60 $\pm$ 0.10         | -25.84 $\pm$ 0.36         | 29.99 $\pm$ 0.34            | -2.67 $\pm$ 0.01               | -21.12 $\pm$ 0.12             |
| 4         | -27.92 $\pm$ 0.15         | -78.78 $\pm$ 0.54         | 80.31 $\pm$ 0.53            | -4.00 $\pm$ 0.02               | -30.39 $\pm$ 0.18             |
| 5         | -21.64 $\pm$ 0.12         | -65.26 $\pm$ 0.70         | 74.14 $\pm$ 0.71            | -3.44 $\pm$ 0.02               | -16.20 $\pm$ 0.12             |

.....

**Table S2. MM/GBSA binding free energies and different components of CsrA-inhibitor complexes calculated from the MD simulations using igb = 2.** <sup>a</sup>All values are given in kcal/mol and as average  $\pm$  SEM (standard error of the mean).

| Compounds | $\Delta E_{vdw}^a$ | $\Delta E_{ele}^a$ | $\Delta G_{polar}^a$ | $\Delta G_{nonpolar}^a$ | $\Delta G_{MM-GBSA}^a$ |
|-----------|--------------------|--------------------|----------------------|-------------------------|------------------------|
| 1         | -23.88 $\pm$ 0.23  | -9.53 $\pm$ 0.23   | 20.59 $\pm$ 0.27     | -2.92 $\pm$ 0.03        | -15.74 $\pm$ 0.20      |
| 2         | -15.95 $\pm$ 0.28  | -21.14 $\pm$ 0.38  | 29.18 $\pm$ 0.44     | -1.96 $\pm$ 0.03        | -9.87 $\pm$ 0.23       |
| 3         | -22.60 $\pm$ 0.10  | -25.84 $\pm$ 0.36  | 33.60 $\pm$ 0.35     | -2.67 $\pm$ 0.01        | -17.51 $\pm$ 0.12      |
| 4         | -27.92 $\pm$ 0.15  | -78.78 $\pm$ 0.54  | 85.50 $\pm$ 0.54     | -4.00 $\pm$ 0.02        | -25.20 $\pm$ 0.17      |
| 5         | -21.64 $\pm$ 0.12  | -65.26 $\pm$ 0.70  | 72.27 $\pm$ 0.67     | -3.44 $\pm$ 0.02        | -18.07 $\pm$ 0.16      |

**Table S3. MM/GBSA binding free energies and different components of CsrA-inhibitor complexes calculated from the MD simulations using igb = 7.** <sup>a</sup>All values are given in kcal/mol and as average  $\pm$  SEM (standard error of the mean).

| Compounds | $\Delta E_{vdw}^a$ | $\Delta E_{ele}^a$ | $\Delta G_{polar}^a$ | $\Delta G_{nonpolar}^a$ | $\Delta G_{MM-GBSA}^a$ |
|-----------|--------------------|--------------------|----------------------|-------------------------|------------------------|
| 1         | -23.88 $\pm$ 0.23  | -9.53 $\pm$ 0.23   | 21.60 $\pm$ 0.30     | -2.92 $\pm$ 0.03        | -14.73 $\pm$ 0.18      |
| 2         | -15.95 $\pm$ 0.28  | -21.14 $\pm$ 0.38  | 32.02 $\pm$ 0.49     | -1.96 $\pm$ 0.03        | -7.03 $\pm$ 0.20       |
| 3         | -22.60 $\pm$ 0.10  | -25.84 $\pm$ 0.36  | 38.63 $\pm$ 0.39     | -2.67 $\pm$ 0.01        | -12.48 $\pm$ 0.12      |
| 4         | -27.92 $\pm$ 0.15  | -78.78 $\pm$ 0.54  | 89.43 $\pm$ 0.54     | -4.00 $\pm$ 0.02        | -21.27 $\pm$ 0.17      |
| 5         | -21.64 $\pm$ 0.12  | -65.26 $\pm$ 0.70  | 69.07 $\pm$ 0.65     | -3.44 $\pm$ 0.02        | -21.27 $\pm$ 0.19      |

**Table S4. MM/GBSA binding free energies and different components of CsrA-inhibitor complexes calculated from the MD simulations using igb = 8.** <sup>a</sup>All values are given in kcal/mol and as average  $\pm$  SEM (standard error of the mean).

| Compounds | $\Delta E_{vdw}^a$ | $\Delta E_{ele}^a$ | $\Delta G_{polar}^a$ | $\Delta G_{nonpolar}^a$ | $\Delta G_{MM-GBSA}^a$ |
|-----------|--------------------|--------------------|----------------------|-------------------------|------------------------|
| 1         | -23.88 $\pm$ 0.23  | -9.53 $\pm$ 0.23   | 22.67 $\pm$ 0.30     | -2.92 $\pm$ 0.03        | -13.66 $\pm$ 0.17      |
| 2         | -15.95 $\pm$ 0.28  | -21.14 $\pm$ 0.38  | 29.53 $\pm$ 0.48     | -1.96 $\pm$ 0.03        | -9.52 $\pm$ 0.20       |
| 3         | -22.60 $\pm$ 0.10  | -25.84 $\pm$ 0.36  | 37.31 $\pm$ 0.37     | -2.67 $\pm$ 0.01        | -13.80 $\pm$ 0.11      |
| 4         | -27.92 $\pm$ 0.15  | -78.78 $\pm$ 0.54  | 89.47 $\pm$ 0.54     | -4.00 $\pm$ 0.02        | -21.23 $\pm$ 0.16      |
| 5         | -21.64 $\pm$ 0.12  | -65.26 $\pm$ 0.70  | 69.40 $\pm$ 0.65     | -3.44 $\pm$ 0.02        | -20.94 $\pm$ 0.18      |

## References

- 1 Janson, G., Zhang, C., Prado, M. G. & Paiardini, A. PyMod 2.0: improvements in protein sequence-structure analysis and homology modeling within PyMOL. *Bioinformatics* **33**, 444-446,(2017).
- 2 Hall, T. A. BioEdit: a user-friendly biological sequence alignment editor and analysis program for Windows 95/98/NT. *Nucl. Acids. Symp. Ser.* **41**, 95-98,(1999).
